# Supplementary material for: Host genetics and susceptibility to congenital and childhood cytomegalovirus infection: a systematic review
Source: PubMed Central journal article supplement (PMC5048223; doi:10.3325/cmj.2016.57.321), 2016-08
Supplement: CroatMedJ_57_s001.pdf [file CroatMedJ_57_s001.pdf]

### Supplementary Table 1. Search terms and details

|                                                                                                                                                                                                                                                                                                                                                                                                                                                                                                                                                                                                                                                                                                                                                                                                                                                                                                                                                                                                                                                                                                                        |
|------------------------------------------------------------------------------------------------------------------------------------------------------------------------------------------------------------------------------------------------------------------------------------------------------------------------------------------------------------------------------------------------------------------------------------------------------------------------------------------------------------------------------------------------------------------------------------------------------------------------------------------------------------------------------------------------------------------------------------------------------------------------------------------------------------------------------------------------------------------------------------------------------------------------------------------------------------------------------------------------------------------------------------------------------------------------------------------------------------------------|
| <b>PubMed (<a href="http://www.ncbi.nlm.nih.gov/pubmed/">http://www.ncbi.nlm.nih.gov/pubmed/</a>)</b>                                                                                                                                                                                                                                                                                                                                                                                                                                                                                                                                                                                                                                                                                                                                                                                                                                                                                                                                                                                                                  |
| (SNP[All Fields] OR "polymorphism*" [All Fields] OR "polymorphism, single nucleotide"[MeSH Terms] OR "single nucleotide polymorphism"[All Fields] OR "polymorphism, genetic"[MeSH Terms] OR "genetic polymorphism"[All Fields] OR ("genes"[MeSH Terms] OR "genes"[All Fields] OR "gene"[All Fields]) OR variant[All Fields]) OR "genotype"[MeSH Terms] OR "alleles"[MeSH Terms] OR "alleles"[All Fields] OR "allele"[All Fields]) AND ("Disease Susceptibility"[Mesh Terms] OR "susceptibility"[All Fields] OR "sensitivity"[All Fields] OR "risk"[MeSH Terms] OR "risk"[All Fields] OR severity[All Fields] OR "association"[MeSH Terms] OR "association"[All Fields] OR "mortality"[Subheading] OR "mortality"[All Fields] OR "mortality"[MeSH Terms]) AND ("cytomegalovirus"[MeSH Terms] OR "cytomegalovirus"[All Fields] OR "human herpesvirus 5"[All Fields] OR "cytomegalovirus infections"[MeSH Terms] OR ("cytomegalovirus"[All Fields] AND "infections"[All Fields]) OR "cytomegalovirus infections"[All Fields]) AND ("humans"[MeSH Terms] OR "humans"[All Fields] OR "human"[All Fields]) AND English[lang] |
| <b>Web of Knowledge (<a href="http://wok.mimas.ac.uk">wok.mimas.ac.uk</a>)</b>                                                                                                                                                                                                                                                                                                                                                                                                                                                                                                                                                                                                                                                                                                                                                                                                                                                                                                                                                                                                                                         |
| TOPIC: ((SNP OR gene OR variant OR polymorphism OR genotype OR allele OR genetic) AND (susceptib* OR sensitiv* OR association OR sever* OR mortality OR risk) AND (cytomegalovirus OR cytomegalovirus infection OR human herpesvirus 5) AND human) AND LANGUAGE:(English)                                                                                                                                                                                                                                                                                                                                                                                                                                                                                                                                                                                                                                                                                                                                                                                                                                              |
| <b>SCOPUS (<a href="http://www.scopus.com/">http://www.scopus.com/</a>)</b>                                                                                                                                                                                                                                                                                                                                                                                                                                                                                                                                                                                                                                                                                                                                                                                                                                                                                                                                                                                                                                            |
| TITLE-ABS-KEY(SNP OR gene OR variant OR polymorphism OR genotype OR allele OR genetic) AND (susceptib* OR sensitiv* OR associat* OR sever* OR mortality OR risk) AND (cytomegalovirus OR cytomegalovirus infection OR human herpesvirus 5) AND (human) AND LANGUAGE(english)                                                                                                                                                                                                                                                                                                                                                                                                                                                                                                                                                                                                                                                                                                                                                                                                                                           |
| <b>HuGe Literature Finder (<a href="http://www.hugenavigator.net">http://www.hugenavigator.net</a>)</b>                                                                                                                                                                                                                                                                                                                                                                                                                                                                                                                                                                                                                                                                                                                                                                                                                                                                                                                                                                                                                |
| CMV                                                                                                                                                                                                                                                                                                                                                                                                                                                                                                                                                                                                                                                                                                                                                                                                                                                                                                                                                                                                                                                                                                                    |
