# Supplementary material for: Host genetics and susceptibility to congenital and childhood cytomegalovirus infection: a systematic review
Source: PubMed Central journal article supplement (PMC5048223; doi:10.3325/cmj.2016.57.321), 2016-08
Supplement: CroatMedJ_57_s002.pdf [file CroatMedJ_57_s002.pdf]

**Supplementary Table 2. Domains and grades of CSI score**

| <b>Domain</b>                | <b>Level A grade</b>                                                                                                                                                                                                                                                                                 | <b>Level B grade</b>                                                                                                                                                                                                                                                                                            | <b>Level C grade</b>                                                                                                                                                                      |
|------------------------------|------------------------------------------------------------------------------------------------------------------------------------------------------------------------------------------------------------------------------------------------------------------------------------------------------|-----------------------------------------------------------------------------------------------------------------------------------------------------------------------------------------------------------------------------------------------------------------------------------------------------------------|-------------------------------------------------------------------------------------------------------------------------------------------------------------------------------------------|
| <b>Confounding risk</b>      | No apparent confounding (or possible confounding properly adjusted for) AND no indication of population stratification                                                                                                                                                                               | Some degree of confounding possible/probable OR study performed in obviously admixed population                                                                                                                                                                                                                 | Detectable levels of confounding OR indication of strong stratification                                                                                                                   |
| <b>Selection bias risk</b>   | Controls drawn from general population AND satisfy Hardy-Weinberg equilibrium (HWE)                                                                                                                                                                                                                  | Controls drawn from structured sampling frame (hospital, clinic or health care programme-based) AND in HWE                                                                                                                                                                                                      | No description on controls recruitment OR controls fail HWE                                                                                                                               |
| <b>Information bias risk</b> | <u>I1</u> : Cases status verified by highly specific molecular methods (antigen test, PCR)<br><u>I2</u> : Controls status verified by highly specific molecular methods (antigen test, PCR)<br><u>I3</u> : Favourable genotyping quality control estimates given, subset or total dataset replicated | <u>I1</u> : Cases status established on the basis of guidelines, clinical status, or less specific methods (isolation, smears and microbiological cultures)<br><u>I2</u> : Controls status inferred from medical records only (no history of disease)<br><u>I3</u> : Partial genotyping quality control results | <u>I1</u> : No clear case definition provided<br><u>I2</u> : No description of disease status in controls (“healthy” controls)<br><u>I3</u> : No indication of genotyping reproducibility |
